# Supplementary material for: Mycobacterium tuberculosis DosS binds H2S through its Fe3+ heme iron to regulate the DosR dormancy regulon
Source: PubMed Central journal article supplement (PMC9062744; doi:10.1016/j.redox.2022.102316), 2022-04-20
Supplement: mmc4.pdf [file mmc4.pdf]

## Supplementary Information for

### ***Mycobacterium tuberculosis* DosS binds H<sub>2</sub>S through its Fe<sup>3+</sup> heme iron to regulate the Dos dormancy regulon**

Ritesh R. Sevalkar<sup>a</sup>, Joel N. Glasgow<sup>a,1</sup>, Martín Pettinati<sup>b,c</sup>, Marcelo A. Marti<sup>d,e</sup>, Vineel P. Reddy<sup>a</sup>, Swati Basu<sup>f</sup>, Elmira Alipour<sup>f</sup>, Daniel B. Kim-Shapiro<sup>f</sup>, Dario A. Estrin<sup>b,c</sup>, Jack R. Lancaster, Jr.<sup>g</sup> and Adrie J.C. Steyn<sup>a,h,1</sup>

<sup>a</sup>Department of Microbiology, and Centers for AIDS Research and Free Radical Biology, University of Alabama at Birmingham, Birmingham, AL

<sup>b</sup>Universidad de Buenos Aires, Facultad de Ciencias Exactas y Naturales, Departamento de Química Inorgánica, Analítica y Química Física, Buenos Aires, Argentina

<sup>c</sup>CONICET-Universidad de Buenos Aires, Instituto de Química Física de los Materiales, Medio Ambiente y Energía (INQUIMAE), Buenos Aires, Argentina

<sup>d</sup>Universidad de Buenos Aires, Facultad de Ciencias Exactas y Naturales, Departamento de Química Biológica, Buenos Aires, Argentina

<sup>e</sup>CONICET-Universidad de Buenos Aires, Instituto de Química Biológica (IQUIBICEN), Buenos Aires, Argentina

<sup>f</sup>Department of Physics, Wake Forest University, Winston-Salem, NC

<sup>g</sup>Department of Pharmacology & Chemical Biology, Vascular Medicine Institute, University of Pittsburgh School of Medicine, Pittsburgh, PA

<sup>h</sup>Africa Health Research Institute, University of KwaZulu-Natal, Durban, South Africa

#### **<sup>1</sup>Corresponding authors:**

Adrie JC Steyn, PhD

Professor, University of Alabama at Birmingham

Investigator, Africa Health Research Institute

**Email:** [asteyn@uab.edu](mailto:asteyn@uab.edu) or [adrie.steyn@ahri.org](mailto:adrie.steyn@ahri.org)

Joel N. Glasgow, PhD

Assistant Professor, University of Alabama at Birmingham

**Email:** [jng@uab.edu](mailto:jng@uab.edu)

#### **This PDF file includes:**

Figures S1 to S6

Table S1-S3

Legends for Movies S1-S3

SI References

#### **Other supplementary materials for this manuscript include the following:**

Movies S1-S3

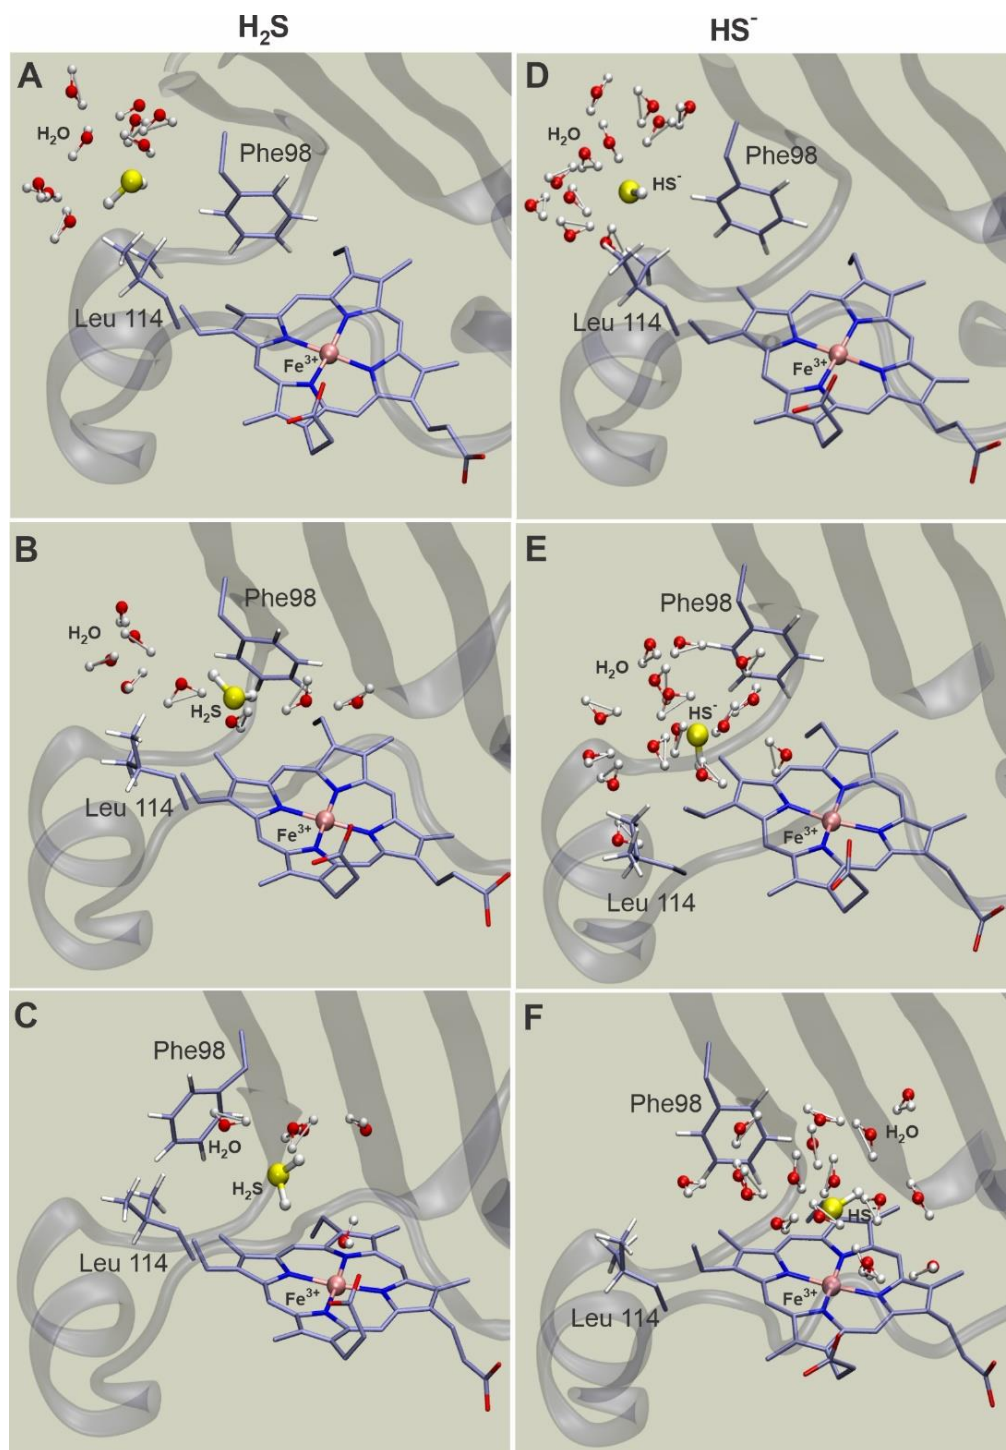

**Fig. S1. Steered Molecular Dynamics (sMD) modeling of sulfide entry into the DosS heme pocket.** Typical snapshots of H<sub>2</sub>S (A-C), and HS<sup>-</sup> (D-F) along the entry path into the DosS heme pocket, representing sulfide ligands at a distance of 11, 8 and 5 Å (upper, medium, and lower panels, respectively) from the heme iron.

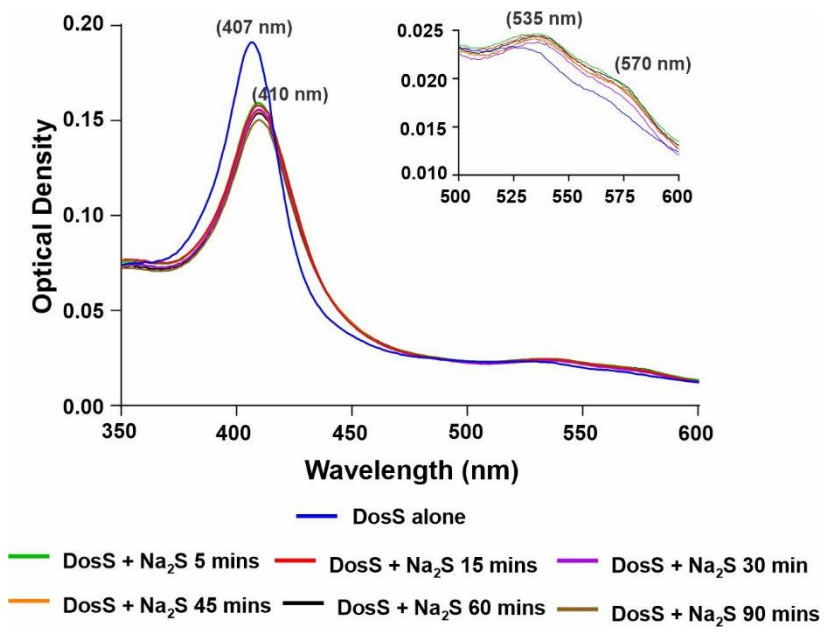

**Fig. S2. UV-Vis time-course scan of DosS and Na<sub>2</sub>S:** Representative UV-Visible spectra of the Fe<sup>3+</sup> form of DosS (3 μM) for 5-90 minutes following the addition of 30 μM Na<sub>2</sub>S. (*Inset*) Absorption spectra replotted to highlight the α (570 nm) and β (535 nm) peaks.

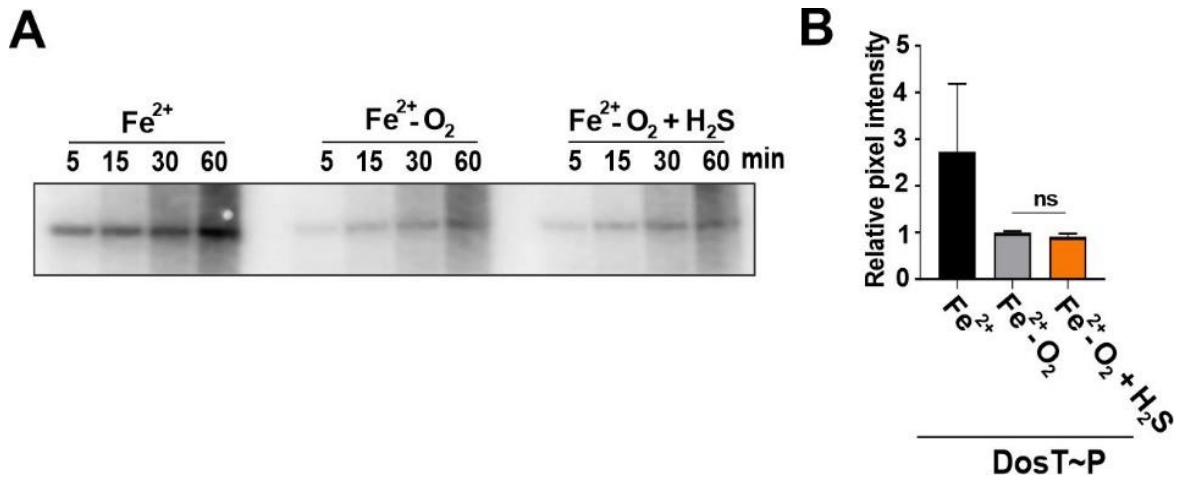

**Fig. S3. Autophosphorylation assay.** (A) Representative autoradiogram of PAGE-resolved  $\gamma$ - $^{32}\text{P}$ -labeled recombinant DosT following autophosphorylation in the presence of  $\gamma$ - $^{32}\text{P}$ -ATP alone (left and center panels) or with  $\gamma$ - $^{32}\text{P}$ -ATP in the presence of 100  $\mu\text{M}$   $\text{Na}_2\text{S}$  (right panel). (B) Densitometric quantitation of DosS bands in (A) at 60 min ( $n=3$ ).

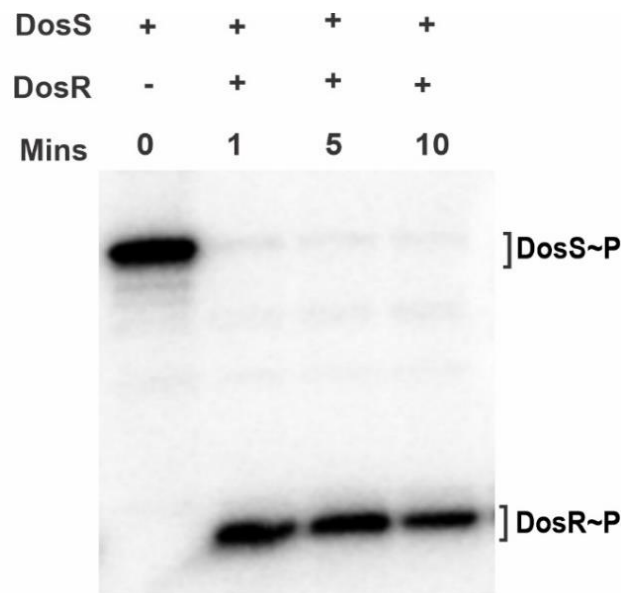

**Fig. S4. Transphosphorylation assay.** Autoradiogram of PAGE-resolved  $^{32}\text{P}$ -labeled DosS in the  $\text{Fe}^{3+}$  form alone after 60 min of autophosphorylation (left lane), and following addition of recombinant DosR to the autokinase reaction. The reactions were stopped 1-10 min following addition of DosR.

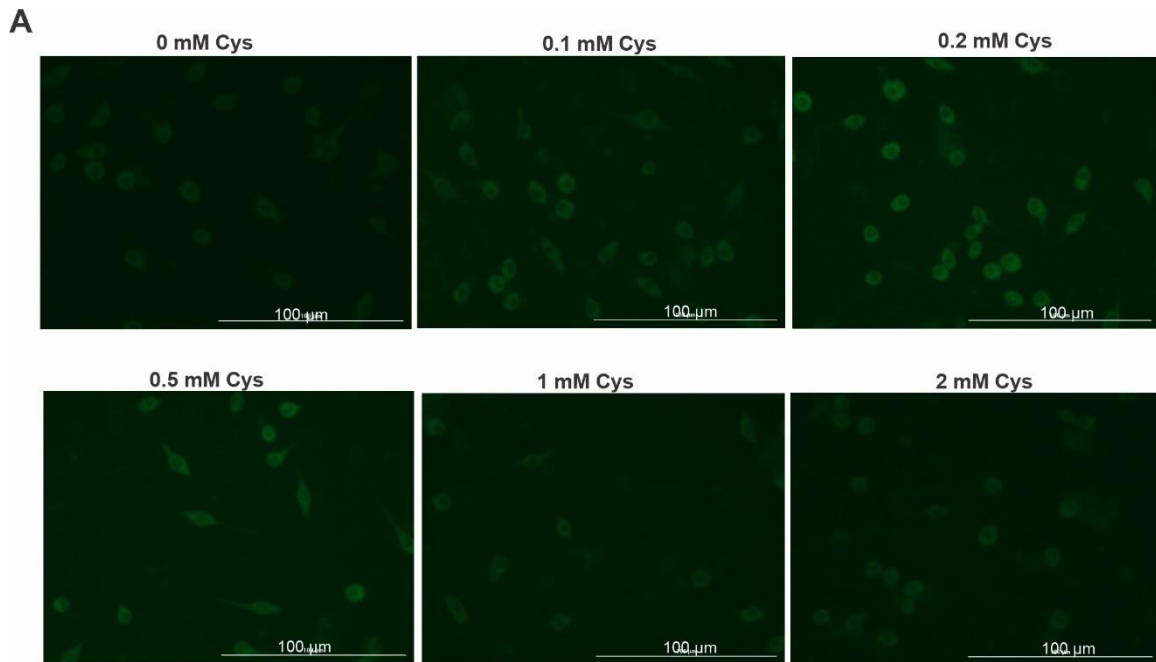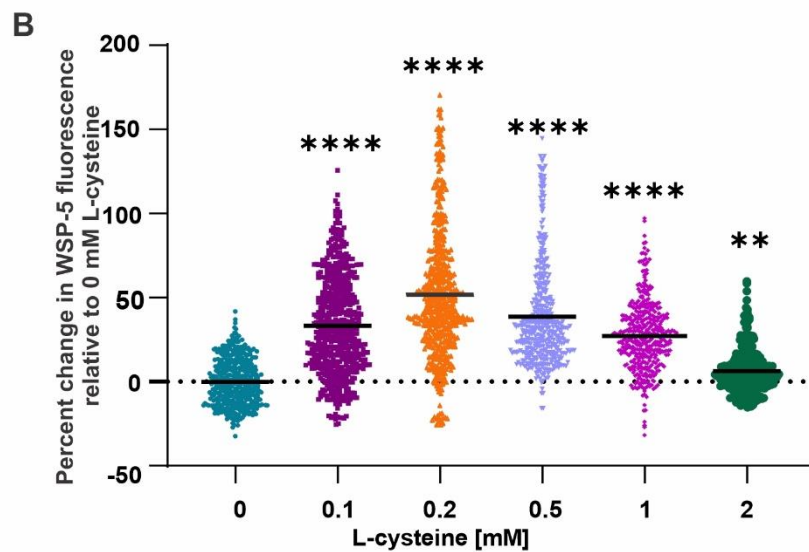

**Fig. S5. Detection of intracellular H<sub>2</sub>S.** (A) Representative images of intracellular WSP-5 fluorescence in RAW 264.7 macrophages grown in media containing 0-2.0 mM L-cysteine (Cys). (B) Percent change in intracellular H<sub>2</sub>S-dependent probe fluorescence levels in RAW 264.7 macrophages in presence of 0-2.0 mM L-cysteine as determined by WSP-5 fluorescence measurements in individual cells. The data were analyzed using Kruskal-Wallis test with Holm-Sidak multiple comparisons. The solid black line represents the mean value of the group. \*\*P < 0.01 and \*\*\*\*P < 0.0001 vs 0 mM L-cysteine control.

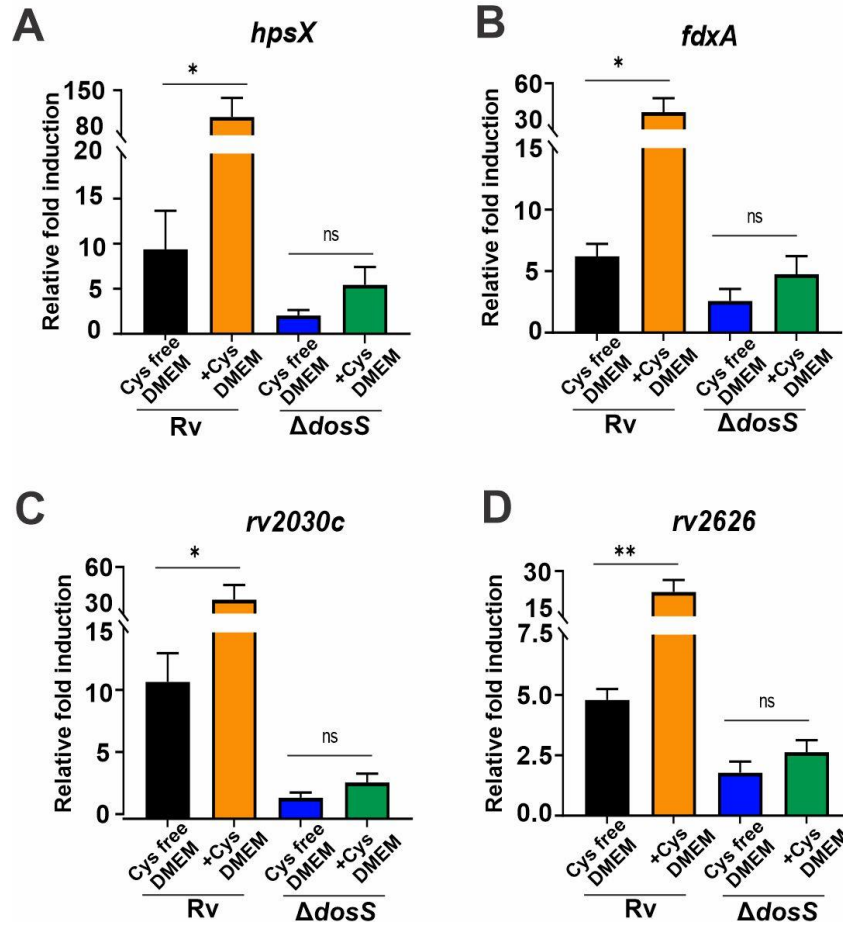

**Fig. S6. Effect of Cysteine depletion in DMEM culture on expression of DosR regulon genes.** (A-D) Expression of representative Dos regulon genes in WT and  $\Delta$ dosS *Mtb* isolated from infected RAW 264.7 macrophages grown cysteine-free DMEM or DMEM containing 200  $\mu$ M L-Cys for 24 hours (n=3). RT-qPCR gene expression data from macrophage-isolated *Mtb* are shown relative to gene expression in WT and  $\Delta$ dosS *Mtb* cultures exposed to DMEM. Data are shown as the mean  $\pm$  SEM and were analyzed using a one-way ANOVA with Tukey post-hoc test performed using GraphPad Prism version 9. \*p< 0.05 and \*\*P < 0.01.

**Table S1: Comparison of Biophysical Parameters of Sulfide-Binding Proteins**

| Protein                                                        | UV-vis (nm)       | EPR (g-values)                              | K <sub>D</sub> (μM)                                                                              | Reference |
|----------------------------------------------------------------|-------------------|---------------------------------------------|--------------------------------------------------------------------------------------------------|-----------|
| <i>Mtb</i> DosS                                                | 415, 535, 570 (s) | 2.67, 2.26, 1.76                            | 5.64 (H <sub>2</sub> S)                                                                          | This work |
| <i>L. pectinata</i> Hb I                                       | 425, 545, 573 (s) | 2.67, 2.24, 1.84                            | 0.09 (X <sub>S<sub>T</sub></sub> )                                                               | (1)       |
| Human Hemoglobin                                               | 423, 577, 541     | 2.51, 2.25, 1.86                            | 17 (X <sub>S<sub>T</sub></sub> )                                                                 | (2)       |
| Bovine Hemoglobin                                              | 425, 542, 575(s)  | 2.55, 2.26, 1.88                            | 7(X <sub>S<sub>T</sub></sub> )                                                                   | (3)       |
| Equine Myoglobin                                               | 427, 547, 580     | 2.56, 2.25, 1.83                            | 96 (X <sub>S<sub>T</sub></sub> )                                                                 | (4), (5)  |
| Human Myeloperoxidase                                          | 432, 625          | 2.567, 2.274, 1.850;<br>2.512, 2.262, 1.875 | < 12 (X <sub>S<sub>T</sub></sub> )                                                               | (6)       |
| Microperoxidase                                                | 414, 536, 568     | --                                          | 219 (calc) (X <sub>S<sub>T</sub></sub> )                                                         | (7)       |
| Truncated <i>B. subtilis</i> Hb                                | 427, 550, 577     | --                                          | 0.2 (X <sub>S<sub>T</sub></sub> )                                                                | (8)       |
| Truncated <i>T. fusca</i> Hb                                   | 425, 550, 575     | --                                          | 0.36 (X <sub>S<sub>T</sub></sub> )                                                               | (8)       |
| <i>E. coli</i> DOS (heme-regulated TCS PDE)                    | 427,546, 579      | --                                          | ca. 200 (X <sub>S<sub>T</sub></sub> ) (based on PDE activation)                                  | (9)       |
| <i>Anaeromyxobacter</i> AfGcHK (heme-regulated TCS His kinase) | 423-426,549-551   | --                                          | 200-5000 (X <sub>S<sub>T</sub></sub> ) for binding, although no autokinase activation with 10 mM | (10)      |

Note: Hemeproteins that get reduced on sulfide binding do not show the EPR spectrum and hence were not used for comparison eg., cytochrome c oxidase, neuroglobin, cytochrome c.

H<sub>2</sub>S = based on H<sub>2</sub>S concentration

X<sub>S<sub>T</sub></sub> = based on concentration of total sulfide species (H<sub>2</sub>S + HS<sup>-</sup> + S<sup>2-</sup>)

TCS = two-component system

(s) = shoulder

calc = calculated



**Table S2. Comparison of structural and electronic parameters of H<sub>2</sub>S and HS<sup>-</sup> bound states obtained from QM/MM calculations**

| Parameter                                               | H <sub>2</sub> S                           | HS <sup>-</sup>            |
|---------------------------------------------------------|--------------------------------------------|----------------------------|
| dFe-S                                                   | 2.35 Å                                     | 2.17 Å                     |
| H <sub>2</sub> S or HS <sup>-</sup> Mulliken population | 0.5543                                     | 0.0984                     |
| dFe-NHis                                                | 2.06 Å                                     | 2.09 Å                     |
| dS-H1<br>dS-H2                                          | towards Tyr 1.36 Å<br>towards water 1.39 Å | 1.35 Å                     |
| H1 Mulliken population<br>H2 Mulliken population        | towards Tyr 0.2242<br>towards water 0.2644 | S-H 0.1698<br>Tyr-H 0.4458 |

**Table S3. DNA Primers used for qRT-PCR.**

| <b>Primer</b> | <b>Primer Sequence (5' to 3')</b> |
|---------------|-----------------------------------|
| SigA-For      | TCGGTTCGCGCCTACCT                 |
| SigA-Rev      | TGGCTAGCTCGACCTCTTCCT             |
| hspX-For      | CGCACCGAGCAGAAGGAC                |
| hsp-Rev       | CCGCCACCGACACAGTAA                |
| fdxA-For      | CCTATGTGATCGGTAGTGA               |
| fdxA-Rev      | GGGTTGATGTAGAGCATT                |
| rv2030-For    | GAATAGTGGTGTGGGCTCATAA            |
| rv2030-Rev    | CGTATCGCTCACGACTATCT              |
| rv2626-For    | CGACCGCGACATTGTGAT                |
| rv2626-Rev    | CATCGACGTAGTAGATGCTGT             |

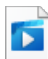

movie\_sh2\_lado.mp4

**Movie S1. Steered Molecular Dynamics modeling of H<sub>2</sub>S entry into the DosS heme pocket.**

The trajectory of H<sub>2</sub>S [shown in yellow (S) and white (H) spheres] approaching the DosS heme is shown. H<sub>2</sub>S first approaches the Y97-F98 pair, and then passes between F98 and the L114-P115 pair to enter the heme pocket, where it interacts with distal Y171. The H<sub>2</sub>S solvation shell waters are represented as small red and white triangles. The overall DosS secondary structure is shown as a cyan tube. Red = oxygen, Blue = nitrogen, Pink = heme center. Movie represents 2.8 ns of simulation with a ligand pulling speed of 0.0025 Å/ps.

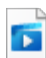

movie\_sh\_lado.mp4

**Movie S2. Steered Molecular Dynamics modeling of HS<sup>-</sup> entry into the DosS heme pocket.**

The trajectory of HS<sup>-</sup> [shown in yellow (S) and white (H) spheres] approaching the DosS heme is shown. HS<sup>-</sup> first approaches the Y97-F98 pair. The barrier for HS<sup>-</sup> entry is formed by disrupting the F98-L114 interaction, which is clearly seen when the L114 sidechain changes separates from F98. HS<sup>-</sup> can then pass between F98 and the L114-P115 pair to enter the heme pocket, where it interacts with distal Y171. The larger barrier for HS<sup>-</sup> is due to the fact that while HS<sup>-</sup> enters almost dry, the negatively charged ligand is always solvated and accompanied by several water molecules. The HS<sup>-</sup> solvation shell waters are represented as small red and white triangles. The overall DosS secondary structure is shown as a cyan tube. Red = oxygen, Blue = nitrogen, Pink = heme center. Movie represents 2.8 ns of simulation with a ligand pulling speed of 0.0025 Å/ps.

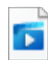

Video Protonation  
of H<sub>2</sub>S - Short.mp4

**Movie S3. QM/MM modeling of deprotonation of H<sub>2</sub>S in DosS heme pocket.**

Deprotonation of H<sub>2</sub>S [shown in yellow (S) and white (H) spheres] following binding to the DosS Fe<sup>3+</sup> heme iron is shown. The proton transfer to a nearby heme propionate group via a water bridge is spontaneous and occurs within 0.35 ps. The QM subsystem is depicted in balls and sticks. The overall DosS secondary structure is shown as a gray ribbon. Red = oxygen, Blue = nitrogen, Pink = heme center. Movie represents 0.4 ns of simulation.

## SI References

1. D. W. Kraus, J. B. Wittenberg, J. F. Lu, J. Peisach, Hemoglobins of the *Lucina pectinata*/bacteria symbiosis. II. An electron paramagnetic resonance and optical spectral study of the ferric proteins. *J Biol Chem* **265**, 16054-16059 (1990).
2. V. Vitvitsky, P. K. Yadav, A. Kurthen, R. Banerjee, Sulfide oxidation by a noncanonical pathway in red blood cells generates thiosulfate and polysulfides. *The Journal of biological chemistry* **290**, 8310-8320 (2015).
3. A. C. Mot *et al.*, Fe(III) - Sulfide interaction in globins: Characterization and quest for a putative Fe(IV)-sulfide species. *J Inorg Biochem* **179**, 32-39 (2018).
4. D. W. Kraus, J. B. Wittenberg, J. F. Lu, J. Peisach, Hemoglobins of the *Lucina pectinata*/bacteria symbiosis. II. An electron paramagnetic resonance and optical spectral study of the ferric proteins. *J.Biol.Chem* **265**, 16054-16059 (1990).
5. T. Bostelaar *et al.*, Hydrogen Sulfide Oxidation by Myoglobin. *Journal of the American Chemical Society* **138**, 8476-8488 (2016).
6. Z. Palinkas *et al.*, Interactions of hydrogen sulfide with myeloperoxidase. *Br J Pharmacol* **172**, 1516-1532 (2015).
7. S. A. Bieza *et al.*, Reactivity of inorganic sulfide species toward a heme protein model. *Inorg Chem* **54**, 527-533 (2015).
8. F. P. Nicoletti *et al.*, Sulfide binding properties of truncated hemoglobins. *Biochemistry* **49**, 2269-2278 (2010).
9. H. Takahashi *et al.*, Hydrogen sulfide stimulates the catalytic activity of a heme-regulated phosphodiesterase from *Escherichia coli* (Ec DOS). *J Inorg Biochem* **109**, 66-71 (2012).
10. V. Fojtikova *et al.*, Effects of hydrogen sulfide on the heme coordination structure and catalytic activity of the globin-coupled oxygen sensor AfGcHK. *Biomaterials* **29**, 715-729 (2016).
